# Supplementary material for: Visceral Adiposity Index, Premature Mortality, and Life Expectancy in US Adults
Source: Research Square preprint supplement (doi:10.21203/rs.3.rs-5985370/v1), 2025-03-27
Supplement: Supplementary file 1 [file e9efff37b34d3eae259ae24a.docx]

**Supplemental Online Content**

**eTable 1.** Overall Unweighted Response Rates for Household Interview and Medical Examination in the US NHANES (1999-2018)

**eTable 2.** HR (95% CI) for Premature Mortality (Death Before Age 80) by VAI Deciles in US Adults (NHANES 1999-2018)a

**eTable 3.** HR (95% CI) for Premature Mortality (Death Before Age 80) by BMI Quartiles in US Adults (NHANES 1999-2018)a

**eTable 4.** HR (95% CI) for Premature Mortality (Death Before Age 80) by BMI Deciles in US Adults (NHANES 1999-2018)a

**eTable 5.** Model Fit Statistics (AIC and BIC) for Hazard Ratios (HR) of Premature Mortality (Death Before Age 80) by VAI and BMI Quartiles in US Adults (NHANES 1999-2018)a

**eTable 6.** Model Fit Statistics (AIC and BIC) for Hazard Ratios (HR) of Premature Mortality (Death Before Age 80) by VAI and BMI Deciles in US Adults (NHANES 1999-2018)a

**eTable 1.** Overall Unweighted Response Rates for Household Interview and Medical Examination in the US NHANES (1999-2018)

| **Survey years** | **Unweighted response rate for household interview** | **Unweighted response rate for medical exam** |
| --- | --- | --- |
| 1999-2000 | 76.62% | 69.83% |
| 2001-2002 | 69.83% | 73.40% |
| 2003-2004 | 72.87% | 69.06% |
| 2005-2006 | 74.44% | 71.46% |
| 2007-2008 | 73.76% | 71.11% |
| 2009-2010 | 73.76% | 71.93% |
| 2011-2012 | 67.97% | 65.22% |
| 2013-2014 | 66.35% | 64.30% |
| 2015-2016 | 64.30% | 64.30% |
| 2017-2018 | 48.24% | 45.70% |

Abbreviations: NHANES, National Health and Nutrition Examination Survey.

**eTable 2.** HR (95% CI) for Premature Mortality (Death Before Age 80) by VAI Deciles in US Adults (NHANES 1999-2018)a

| **Group and model** | **HR (95% CI) by VAI deciles** | | | | | | | | | | |
| --- | --- | --- | --- | --- | --- | --- | --- | --- | --- | --- | --- |
| **D1** | **D2** | **D2** | **D4** | **D5** | **D6** | **D7** | **D8** | **D9** | **D10** | **P for trend** |
| **(≤ 0.66)** | **(0.66 to ≤ 0.89)** | **(0.89 to ≤ 1.12)** | **(1.12 to ≤ 1.39)** | **(1.39 to ≤ 1.70)** | **(1.70 to ≤ 2.09)** | **(2.09 to ≤ 2.60)** | **(2.60 to ≤ 3.36)** | **(3.36 to ≤ 4.82)** | **(>4.82)** |
| **All** | | | | | | | | | | | |
| None adjusted | 1 [Ref] | 1.09 (0.80, 1.49) | **1.33 (1.01, 1.75)*** | 1.15 (0.84, 1.57) | 1.21 (0.86, 1.70) | **1.63 (1.17, 2.26)**** | **1.47 (1.05, 2.06)*** | **2.11 (1.54, 2.89)***** | **2.27 (1.70, 3.04)***** | **2.71 (2.02, 3.63)***** | <0.001 |
| Age, sex, and race/ethnicity adjusted | 1 [Ref] | 1.07 (0.77, 1.47) | 1.21 (0.92, 1.58) | 1.06 (0.77, 1.46) | 1.06 (0.75, 1.49) | **1.43 (1.03, 1.98)*** | 1.24 (0.88, 1.75) | **1.79 (1.31, 2.46)***** | **2.00 (1.48, 2.71)***** | **2.41 (1.78, 3.27)***** | <0.001 |
| Multivariate adjustedb | 1 [Ref] | 1.18 (0.82, 1.71) | 1.24 (0.90, 1.73) | 1.02 (0.71, 1.47) | 1.01 (0.67, 1.52) | 1.32 (0.92, 1.90) | 1.26 (0.86, 1.85) | **1.71 (1.18, 2.49)**** | **1.72 (1.21, 2.45)**** | **2.14 (1.49, 3.07)***** | <0.001 |
| **Women** | | | | | | | | | | | |
| None adjusted | 1 [Ref] | 1.66 (0.83, 3.31) | 1.85 (0.95, 3.63) | 1.70 (0.91, 3.17) | 1.49 (0.75, 2.96) | **2.25 (1.20, 4.21)*** | **2.46 (1.27, 4.75)**** | **3.59 (1.87, 6.92)***** | **4.75 (2.56, 8.80)***** | **5.78 (3.09, 10.83)***** | <0.001 |
| Age, sex, and race/ethnicity adjusted | 1 [Ref] | 1.51 (0.75, 3.01) | 1.64 (0.84, 3.20) | 1.47 (0.77, 2.80) | 1.24 (0.62, 2.48) | 1.78 (0.95, 3.33) | 1.86 (0.94, 3.67) | **2.78 (1.43, 5.39)**** | **3.61 (1.91, 6.81)***** | **4.34 (2.28, 8.26)***** | <0.001 |
| Multivariate adjustedb | 1 [Ref] | 1.71 (0.78, 3.74) | 1.60 (0.74, 3.46) | 1.63 (0.77, 3.45) | 1.09 (0.47, 2.52) | 1.68 (0.83, 3.40) | 1.76 (0.81, 3.86) | **2.47 (1.12, 5.44)*** | **2.91 (1.37, 6.19)**** | **3.91 (1.85, 8.26)***** | <0.001 |
| **Men** | | | | | | | | | | | |
| None adjusted | 1 [Ref] | 0.97 (0.67, 1.38) | 1.23 (0.89, 1.71) | 1.02 (0.70, 1.49) | 1.17 (0.79, 1.75) | **1.50 (1.02, 2.21)*** | 1.17 (0.76, 1.81) | **1.70 (1.15, 2.51)**** | **1.53 (1.02, 2.29)*** | **1.79 (1.27, 2.52)**** | <0.001 |
| Age, sex, and race/ethnicity adjusted | 1 [Ref] | 0.93 (0.64, 1.36) | 1.09 (0.78, 1.52) | 0.95 (0.65, 1.40) | 1.03 (0.69, 1.52) | 1.37 (0.94, 2.01) | 1.07 (0.69, 1.66) | **1.51 (1.02, 2.23)*** | 1.47 (0.98, 2.22) | **1.82 (1.27, 2.60)**** | <0.001 |
| Multivariate adjustedb | 1 [Ref] | 1.04 (0.67, 1.60) | 1.18 (0.78, 1.76) | 0.85 (0.55, 1.31) | 1.01 (0.64, 1.61) | 1.25 (0.82, 1.91) | 1.15 (0.71, 1.88) | 1.53 (0.97, 2.39) | 1.32 (0.82, 2.12) | **1.55 (1.00, 2.40)*** | 0.007 |
| **Non-Hispanic Black individuals** | | | | | | | | | | | |
| None adjusted | 1 [Ref] | 0.99 (0.62, 1.57) | **1.59 (1.01, 2.51)*** | 1.47 (0.91, 2.38) | 1.24 (0.74, 2.09) | **2.01 (1.24, 3.26)*** | **2.20 (1.36, 3.56)**** | 1.64 (0.78, 3.46) | **2.11 (1.13, 3.96)*** | **4.26 (2.57, 7.08)***** | <0.001 |
| Age, sex, and race/ethnicity adjusted | 1 [Ref] | 0.94 (0.60, 1.49) | 1.36 (0.87, 2.14) | 1.27 (0.79, 2.05) | 1.14 (0.69, 1.88) | **1.67 (1.03, 2.72)*** | **1.87 (1.14, 3.06)*** | 1.37 (0.65, 2.88) | **1.88 (1.01, 3.48)*** | **4.33 (2.66, 7.05)***** | <0.001 |
| Multivariate adjustedb | 1 [Ref] | 1.23 (0.73, 2.08) | 1.48 (0.82, 2.65) | 1.35 (0.75, 2.43) | 1.27 (0.67, 2.41) | 1.54 (0.84, 2.82) | **1.79 (1.03, 3.13)*** | 1.21 (0.56, 2.58) | **2.34 (1.13, 4.85)*** | **4.11 (2.17, 7.81)***** | 0.001 |
| **Non-Hispanic White individuals** | | | | | | | | | | | |
| None adjusted | 1 [Ref] | 1.16 (0.78, 1.74) | 1.22 (0.84, 1.78) | 1.11 (0.75, 1.65) | 1.23 (0.80, 1.89) | **1.54 (1.02, 2.33)*** | 1.36 (0.88, 2.09) | **2.31 (1.55, 3.44)***** | **2.20 (1.51, 3.20)***** | **2.69 (1.83, 3.96)***** | <0.001 |
| Age, sex, and race/ethnicity adjusted | 1 [Ref] | 1.13 (0.74, 1.72) | 1.11 (0.76, 1.61) | 1.01 (0.68, 1.50) | 1.03 (0.67, 1.59) | 1.30 (0.86, 1.96) | 1.09 (0.70, 1.70) | **1.84 (1.23, 2.73)**** | **1.86 (1.26, 2.75)**** | **2.28 (1.53, 3.38)***** | <0.001 |
| Multivariate adjustedb | 1 [Ref] | 1.24 (0.78, 1.98) | 1.14 (0.74, 1.76) | 0.95 (0.60, 1.50) | 0.91 (0.54, 1.53) | 1.21 (0.78, 1.89) | 1.10 (0.68, 1.75) | **1.70 (1.07, 2.71)*** | **1.57 (1.02, 2.41)*** | **2.02 (1.31, 3.14)**** | <0.001 |
| **Hispanic Americans** | | | | | | | | | | | |
| None adjusted | 1 [Ref] | 1.39 (0.55, 3.55) | 2.14 (0.85, 5.37) | 1.69 (0.64, 4.49) | 1.32 (0.53, 3.32) | 2.04 (0.96, 4.35) | **2.46 (1.12, 5.42)*** | 1.45 (0.54, 3.87) | 2.35 (0.96, 5.78) | **4.05 (1.77, 9.27)**** | 0.002 |
| Age, sex, and race/ethnicity adjusted | 1 [Ref] | 1.10 (0.43, 2.80) | 1.56 (0.64, 3.77) | 1.17 (0.43, 3.17) | 0.99 (0.41, 2.40) | 1.37 (0.65, 2.92) | 1.54 (0.68, 3.44) | 0.91 (0.33, 2.48) | 1.45 (0.59, 3.55) | **2.33 (1.00, 5.41)*** | 0.104 |
| Multivariate adjustedb | 1 [Ref] | 1.15 (0.39, 3.42) | 1.54 (0.61, 3.89) | 1.21 (0.37, 3.92) | 1.05 (0.38, 2.96) | 1.26 (0.50, 3.18) | 1.76 (0.75, 4.16) | 0.91 (0.31, 2.66) | 1.37 (0.48, 3.93) | 2.06 (0.79, 5.39) | 0.301 |

Abbreviation: VAI, visceral adiposity index; NHANES, National Health and Nutrition Examination Survey; HR, hazard ratio; 95% CI, 95% confidence interval; Ref, reference group.

a Nationally representative estimates of the non-pregnant US population aged >20 years by applying survey weights.

b Multivariate adjustment for age, sex, race and ethnicity, poverty income ratio, insurance status, cigarette smoking, alcohol drinking, and family history (cardiovascular disease or diabetes).

**P* < 0.05; ***P* < 0.01; ****P* < 0.001.

**eTable 3.** HR (95% CI) for Premature Mortality (Death Before Age 80) by BMI Quartiles in US Adults (NHANES 1999-2018)a

| **Group and model** | **HR (95% CI)** **by** **BMI quartiles (kg/m2)** | | | | |
| --- | --- | --- | --- | --- | --- |
| **Q1 (≤ 24.36)** | **Q2 (24.36 to ≤ 27.93)** | **Q3 (****27.93 to ≤ 32.27)** | **Q4 (****> 32.27)** | **P for trend** |
| **All** | | | | | |
| None adjusted | 1 [Ref] | 1.12 (0.93, 1.35) | 1.14 (0.97, 1.34) | **1.55 (1.27, 1.90)***** | <0.001 |
| Age, sex, and race/ethnicity adjusted | 1 [Ref] | 0.88 (0.73, 1.06) | 0.87 (0.74, 1.02) | **1.36 (1.12, 1.67)**** | 0.005 |
| Multivariate adjustedb | 1 [Ref] | 1.04 (0.84, 1.28) | 1.03 (0.84, 1.26) | **1.63 (1.32, 2.00)***** | <0.001 |
| **Women** | | | | | |
| None adjusted | 1 [Ref] | 1.13 (0.85, 1.51) | **1.35 (1.00, 1.82)*** | **1.57 (1.17, 2.10)**** | 0.002 |
| Age, sex, and race/ethnicity adjusted | 1 [Ref] | 0.95 (0.71, 1.26) | 1.07 (0.78, 1.47) | **1.38 (1.01, 1.88)*** | 0.040 |
| Multivariate adjustedb | 1 [Ref] | 0.94 (0.67, 1.33) | 1.04 (0.72, 1.49) | 1.41 (0.98, 2.03) | 0.060 |
| **Men** | | | | | |
| None adjusted | 1 [Ref] | 0.97 (0.76, 1.23) | 0.90 (0.72, 1.13) | **1.50 (1.13, 2.00)**** | 0.020 |
| Age, sex, and race/ethnicity adjusted | 1 [Ref] | 0.82 (0.65, 1.05) | **0.76 (0.60, 0.95)*** | **1.33 (1.01, 1.76)*** | 0.080 |
| Multivariate adjustedb | 1 [Ref] | 1.08 (0.81, 1.45) | 1.01 (0.78, 1.31) | **1.77 (1.30, 2.40)***** | 0.001 |
| **Non-Hispanic Black individuals** | | | | | |
| None adjusted | 1 [Ref] | 0.89 (0.66, 1.20) | **0.65 (0.47, 0.88)*** | 0.81 (0.59, 1.13) | 0.130 |
| Age, sex, and race/ethnicity adjusted | 1 [Ref] | 0.74 (0.54, 1.01) | **0.50 (0.37, 0.70)*** | 0.85 (0.60, 1.20) | 0.240 |
| Multivariate adjustedb | 1 [Ref] | 0.97 (0.65, 1.43) | 0.67 (0.43, 1.04) | 1.14 (0.73, 1.77) | 0.750 |
| **Non-Hispanic White individuals** | | | | | |
| None adjusted | 1 [Ref] | 1.15 (0.90, 1.48) | **1.29 (1.05, 1.57)*** | **1.69 (1.29, 2.21)***** | <0.001 |
| Age, sex, and race/ethnicity adjusted | 1 [Ref] | 0.85 (0.66, 1.10) | 0.92 (0.74, 1.14) | **1.40 (1.08, 1.82)*** | 0.009 |
| Multivariate adjustedb | 1 [Ref] | 1.03 (0.78, 1.35) | 1.11 (0.86, 1.42) | **1.73 (1.32, 2.29)***** | <0.001 |
| **Hispanic Americans** | | | | | |
| None adjusted | 1 [Ref] | 1.54 (0.93, 2.56) | 1.38 (0.78, 2.45) | **1.96 (1.10, 3.46)*** | 0.040 |
| Age, sex, and race/ethnicity adjusted | 1 [Ref] | 1.37 (0.82, 2.27) | 1.17 (0.65, 2.14) | 1.79 (0.99, 3.24) | 0.100 |
| Multivariate adjustedb | 1 [Ref] | 1.20 (0.69, 2.08) | 1.29 (0.68, 2.43) | 1.58 (0.85, 2.93) | 0.140 |

Abbreviation: BMI, body mass index; NHANES, National Health and Nutrition Examination Survey; HR, hazard ratio; 95% CI, 95% confidence interval; Ref, reference group.

a Nationally representative estimates of the non-pregnant US population aged >20 years by applying survey weights.

b Multivariate adjustment for age, sex, race and ethnicity, poverty income ratio, insurance status, cigarette smoking, alcohol drinking, and family history (cardiovascular disease or diabetes).

**P* < 0.05; ***P* < 0.01; ****P* < 0.001.

**eTable 4.** HR (95% CI) for Premature Mortality (Death Before Age 80) by BMI Deciles in US Adults (NHANES 1999-2018)a

| **Group and model** | **HR (95% CI) by BMI deciles (kg/m2)** | | | | | | | | | | |
| --- | --- | --- | --- | --- | --- | --- | --- | --- | --- | --- | --- |
| **D1** | **D2** | **D2** | **D4** | **D5** | **D6** | **D7** | **D8** | **D9** | **D10** | **P for trend** |
| **(≤ 21.67)** | **(21.67 to ≤ 23.59)** | **(23.59 to ≤ 25.11)** | **(25.11 to ≤ 26.52)** | **(26.52 to ≤ 27.93)** | **(27.93 to ≤ 29.41)** | **(29.41 to ≤ 31.21)** | **(31.21 to ≤ 33.59)** | **(33.59 to ≤ 37.51)** | **(>37.51)** |
| **All** | | | | | | | | | | | |
| None adjusted | 1 [Ref] | **0.71 (0.52, 0.97)*** | 0.82 (0.62, 1.09) | 0.98 (0.76, 1.27) | 0.93 (0.69, 1.27) | 0.77 (0.58, 1.02) | 1.06 (0.82, 1.36) | 1.09 (0.82, 1.46) | 1.25 (0.93, 1.69) | **1.48 (1.12, 1.96)**** | <0.001 |
| Age, sex, and race/ethnicity adjusted | 1 [Ref] | **0.60 (0.44, 0.83)**** | **0.59 (0.44, 0.79)***** | **0.66 (0.51, 0.84)**** | **0.64 (0.47, 0.87)**** | **0.51 (0.38, 0.68)***** | **0.71 (0.55, 0.91)**** | 0.74 (0.55, 1.00) | 0.90 (0.67, 1.22) | 1.27 (0.97, 1.66) | 0.003 |
| Multivariate adjustedb | 1 [Ref] | 0.71 (0.48, 1.04) | 0.72 (0.51, 1.02) | 0.82 (0.61, 1.10) | 0.87 (0.63, 1.20) | 0.69 (0.49, 0.99)* | 0.94 (0.70, 1.27) | 0.87 (0.63, 1.20) | 1.25 (0.91, 1.73) | **1.62 (1.19, 2.21)**** | <0.001 |
| **Women** | | | | | | | | | | | |
| None adjusted | 1 [Ref] | 0.67 (0.40, 1.14) | 0.77 (0.48, 1.24) | 0.93 (0.55, 1.58) | 1.06 (0.67, 1.66) | 0.93 (0.57, 1.53) | 1.13 (0.74, 1.73) | 1.27 (0.77, 2.10) | 1.13 (0.73, 1.75) | **1.53 (1.00, 2.35)*** | 0.001 |
| Age, sex, and race/ethnicity adjusted | 1 [Ref] | 0.61 (0.36, 1.05) | **0.60 (0.38, 0.97)*** | 0.71 (0.41, 1.24) | 0.81 (0.53, 1.25) | 0.68 (0.41, 1.14) | 0.84 (0.55, 1.29) | 0.94 (0.55, 1.59) | 0.87 (0.55, 1.38) | 1.30 (0.85, 1.99) | 0.030 |
| Multivariate adjustedb | 1 [Ref] | 0.66 (0.35, 1.26) | 0.66 (0.38, 1.14) | 0.76 (0.42, 1.36) | 0.84 (0.52, 1.36) | 0.83 (0.45, 1.52) | 0.84 (0.50, 1.39) | 0.83 (0.45, 1.50) | 1.00 (0.58, 1.73) | 1.38 (0.81, 2.37) | 0.050 |
| **Men** | | | | | | | | | | | |
| None adjusted | 1 [Ref] | **0.67 (0.46, 0.96)*** | 0.72 (0.50, 1.05) | 0.81 (0.60, 1.10) | 0.70 (0.49, 1.00) | **0.55 (0.38, 0.80)**** | 0.82 (0.58, 1.16) | 0.82 (0.57, 1.19) | 1.17 (0.80, 1.72) | 1.45 (0.95, 2.21) | 0.010 |
| Age, sex, and race/ethnicity adjusted | 1 [Ref] | **0.58 (0.40, 0.84)**** | **0.56 (0.39, 0.81)**** | **0.60 (0.44, 0.81)**** | **0.54 (0.38, 0.78)**** | **0.42 (0.29, 0.60)***** | **0.62 (0.44, 0.88)**** | **0.61 (0.42, 0.88)**** | 0.88 (0.60, 1.29) | 1.22 (0.82, 1.84) | 0.070 |
| Multivariate adjustedb | 1 [Ref] | 0.72 (0.46, 1.13) | 0.76 (0.48, 1.20) | 0.85 (0.56, 1.28) | 0.87 (0.58, 1.31) | **0.62 (0.40, 0.96)*** | 0.99 (0.67, 1.46) | 0.87 (0.56, 1.35) | 1.40 (0.93, 2.12) | **1.79 (1.11, 2.88)*** | <0.001 |
| **Non-Hispanic Black individuals** | | | | | | | | | | | |
| None adjusted | 1 [Ref] | 1.21 (0.68, 2.16) | 1.07 (0.62, 1.84) | 1.00 (0.58, 1.72) | 0.91 (0.53, 1.53) | 0.61 (0.35, 1.07) | 0.85 (0.50, 1.44) | 0.90 (0.53, 1.53) | 0.94 (0.53, 1.65) | 0.78 (0.49, 1.25) | 0.080 |
| Age, sex, and race/ethnicity adjusted | 1 [Ref] | 0.93 (0.52, 1.67) | 0.83 (0.50, 1.36) | 0.65 (0.37, 1.14) | 0.68 (0.40, 1.16) | **0.40 (0.23, 0.70)**** | 0.59 (0.35, 1.01) | 0.61 (0.35, 1.06) | 0.80 (0.46, 1.38) | 0.76 (0.48, 1.21) | 0.180 |
| Multivariate adjustedb | 1 [Ref] | 1.38 (0.66, 2.91) | 1.42 (0.78, 2.57) | 1.04 (0.53, 2.07) | 1.31 (0.69, 2.48) | 0.82 (0.42, 1.60) | 1.12 (0.61, 2.06) | 1.04 (0.52, 2.08) | 1.34 (0.73, 2.46) | 1.37 (0.77, 2.45) | 0.820 |
| **Non-Hispanic White individuals** | | | | | | | | | | | |
| None adjusted | 1 [Ref] | **0.66 (0.43, 0.99)*** | 0.74 (0.52, 1.06) | 0.99 (0.70, 1.40) | 0.91 (0.61, 1.37) | 0.80 (0.56, 1.14) | 1.11 (0.78, 1.56) | 1.18 (0.83, 1.68) | 1.25 (0.83, 1.88) | **1.60 (1.11, 2.30)*** | <0.001 |
| Age, sex, and race/ethnicity adjusted | 1 [Ref] | **0.55 (0.35, 0.84)**** | **0.51 (0.36, 0.74)***** | **0.62 (0.44, 0.88)**** | **0.58 (0.38, 0.87)*** | **0.48 (0.33, 0.70)***** | **0.68 (0.48, 0.97)*** | 0.73 (0.51, 1.07) | 0.83 (0.55, 1.24) | 1.31 (0.93, 1.86) | 0.006 |
| Multivariate adjustedb | 1 [Ref] | **0.61 (0.37, 0.99)*** | **0.60 (0.39, 0.92)*** | 0.75 (0.51, 1.09) | 0.77 (0.52, 1.16) | 0.65 (0.42, 1.00) | 0.90 (0.64, 1.28) | 0.84 (0.57, 1.24) | 1.20 (0.80, 1.80) | **1.66 (1.12, 2.45)** | <0.001 |
| **Hispanic Americans** | | | | | | | | | | | |
| None adjusted | 1 [Ref] | 0.90 (0.39, 2.09) | 1.26 (0.52, 3.04) | 1.62 (0.80, 3.25) | 1.36 (0.57, 3.22) | 1.53 (0.62, 3.80) | 0.97 (0.49, 1.92) | 1.56 (0.63, 3.86) | 1.82 (0.76, 4.37) | 2.10 (0.94, 4.72) | 0.050 |
| Age, sex, and race/ethnicity adjusted | 1 [Ref] | 0.84 (0.35, 2.01) | 1.03 (0.41, 2.55) | 1.20 (0.58, 2.50) | 1.08 (0.45, 2.61) | 1.20 (0.46, 3.14) | 0.71 (0.36, 1.40) | 1.29 (0.49, 3.38) | 1.43 (0.56, 3.66) | 1.74 (0.74, 4.14) | 0.130 |
| Multivariate adjustedb | 1 [Ref] | 0.66 (0.21, 2.08) | 1.02 (0.37, 2.80) | 0.97 (0.41, 2.29) | 0.76 (0.28, 2.01) | 1.25 (0.45, 3.47) | 0.67 (0.31, 1.43) | 1.17 (0.41, 3.32) | 1.01 (0.38, 2.67) | 1.58 (0.61, 4.11) | 0.230 |

Abbreviation: BMI, body mass index; NHANES, National Health and Nutrition Examination Survey; HR, hazard ratio; 95% CI, 95% confidence interval; Ref, reference group.

a Nationally representative estimates of the non-pregnant US population aged >20 years by applying survey weights.

b Multivariate adjustment for age, sex, race and ethnicity, poverty income ratio, insurance status, cigarette smoking, alcohol drinking, and family history (cardiovascular disease or diabetes).

**P* < 0.05; ***P* < 0.01; ****P* < 0.001.

**eTable 5.** Model Fit Statistics (AIC and BIC) for Hazard Ratios (HR) of Premature Mortality (Death Before Age 80) by VAI and BMI Quartiles in US Adults (NHANES 1999-2018)a

| **Group and model** | **Model fit** | **None adjusted** | | **Age, sex, and race/ethnicity adjusted** | | | **Multivariate adjustedb** | |
| --- | --- | --- | --- | --- | --- | --- | --- | --- |
| **VAI** | **BMI** | | **VAI** | **BMI** | **VAI** | **BMI** |
| All | AIC | 1.03e+08 | 1.04e+08 | | 9.64e+07 | 9.68e+07 | 7.65e+07 | 7.65e+07 |
| BIC | 1.03e+08 | 1.04e+08 | | 9.64e+07 | 9.68e+07 | 7.65e+07 | 7.65e+07 |
| Women | AIC | 4.12e+07 | 4.21e+07 | | 3.94e+07 | 4.00e+07 | 3.10e+07 | 3.12e+07 |
| BIC | 4.12e+07 | 4.21e+07 | | 3.94e+07 | 4.00e+07 | 3.10e+07 | 3.12e+07 |
| Men | AIC | 6.09e+07 | 6.09e+07 | | 5.67e+07 | 5.66e+07 | 4.53e+07 | 4.51e+07 |
| BIC | 6.09e+07 | 6.09e+07 | | 5.67e+07 | 5.66e+07 | 4.53e+07 | 4.51e+07 |
| Non-Hispanic Black individuals | AIC | 1.31e+07 | 1.32e+07 | | 1.21e+07 | 1.21e+07 | 8925527 | 8967760 |
| BIC | 1.31e+07 | 1.32e+07 | | 1.21e+07 | 1.21e+07 | 8925606 | 8967839 |
| Non-Hispanic White individuals | AIC | 7.45e+07 | 7.49e+07 | | 7.01e+07 | 7.03e+07 | 5.60e+07 | 5.60e+07 |
| BIC | 7.45e+07 | 7.49e+07 | | 7.01e+07 | 7.03e+07 | 5.60e+07 | 5.60e+07 |
| Hispanic Americans | AIC | 5591962 | 5595141 | | 5086427 | 5072159 | 4061071 | 4056432 |
| BIC | 5591992 | 5595172 | | 5086471 | 5072203 | 4061149 | 4056510 |

Abbreviation: VAI, visceral adiposity index; BMI, body mass index; NHANES, National Health and Nutrition Examination Survey; AIC, Akaike Information Criterion; BIC, Bayesian Information Criterion.

a Nationally representative estimates of the non-pregnant US population aged >20 years by applying survey weights.

b Multivariate adjustment for age, sex, race and ethnicity, poverty income ratio, insurance status, cigarette smoking, alcohol drinking, and family history (cardiovascular disease or diabetes).

AIC and BIC were calculated based on the log-likelihood, degrees of freedom, and sample size, with lower values indicating better model fit.

**eTable 6.** Model Fit Statistics (AIC and BIC) for Hazard Ratios (HR) of Premature Mortality (Death Before Age 80) by VAI and BMI Deciles in US Adults (NHANES 1999-2018)a

| **Group and model** | **Model fit** | **None adjusted** | | **Age, sex, and race/ethnicity adjusted** | | | **Multivariate adjustedb** | |
| --- | --- | --- | --- | --- | --- | --- | --- | --- |
| **VAI** | **BMI** | | **VAI** | **BMI** | **VAI** | **BMI** |
| All | AIC | 1.03e+08 | 1.04e+08 | | 9.62e+07 | 9.64e+07 | 7.63e+07 | 7.63e+07 |
| BIC | 1.03e+08 | 1.04e+08 | | 9.62e+07 | 9.64e+07 | 7.63e+07 | 7.63e+07 |
| Women | AIC | 4.11e+07 | 4.20e+07 | | 3.93e+07 | 3.99e+07 | 3.08e+07 | 3.11e+07 |
| BIC | 4.11e+07 | 4.20e+07 | | 3.93e+07 | 3.99e+07 | 3.08e+07 | 3.11e+07 |
| Men | AIC | 6.08e+07 | 6.06e+07 | | 5.67e+07 | 5.63e+07 | 4.52e+07 | 4.49e+07 |
| BIC | 6.08e+07 | 6.06e+07 | | 5.67e+07 | 5.63e+07 | 4.52e+07 | 4.49e+07 |
| Non-Hispanic Black individuals | AIC | 1.30e+07 | 1.32e+07 | | 1.20e+07 | 1.21e+07 | 8893938 | 8978389 |
| BIC | 1.30e+07 | 1.32e+07 | | 1.20e+07 | 1.21e+07 | 8894054 | 8978504 |
| Non-Hispanic White individuals | AIC | 7.43e+07 | 7.47e+07 | | 6.99e+07 | 6.98e+07 | 5.57e+07 | 5.57e+07 |
| BIC | 7.43e+07 | 7.47e+07 | | 6.99e+07 | 6.98e+07 | 5.57e+07 | 5.57e+07 |
| Hispanic Americans | AIC | 5542880 | 5586719 | | 5051285 | 5063233 | 4038798 | 4036953 |
| BIC | 5542948 | 5586786 | | 5051366 | 5063313 | 4038912 | 4037066 |

Abbreviation: VAI, visceral adiposity index; BMI, body mass index; NHANES, National Health and Nutrition Examination Survey; AIC, Akaike Information Criterion; BIC, Bayesian Information Criterion.

a Nationally representative estimates of the non-pregnant US population aged >20 years by applying survey weights.

b Multivariate adjustment for age, sex, race and ethnicity, poverty income ratio, insurance status, cigarette smoking, alcohol drinking, and family history (cardiovascular disease or diabetes).

AIC and BIC were calculated based on the log-likelihood, degrees of freedom, and sample size, with lower values indicating better model fit.
